# Supplementary material for: Reactive triblock copolymer micelles induced by click reaction: A platform for RAFT polymerization
Source: Royal Society of Chemistry journal article supplement (doi:10.1039/c1sm06225e), 2011-01-01
Supplement: c1sm06225e.pdf [file c1sm06225e.pdf]

## Electronic Supplementary Information

### Reactive Triblock Copolymer Micelles Induced by Click Reaction: A Platform for RAFT Polymerization

5

Jie Jin, Jia Tian, Xueming Lian, Pingchuan Sun and Hanying Zhao

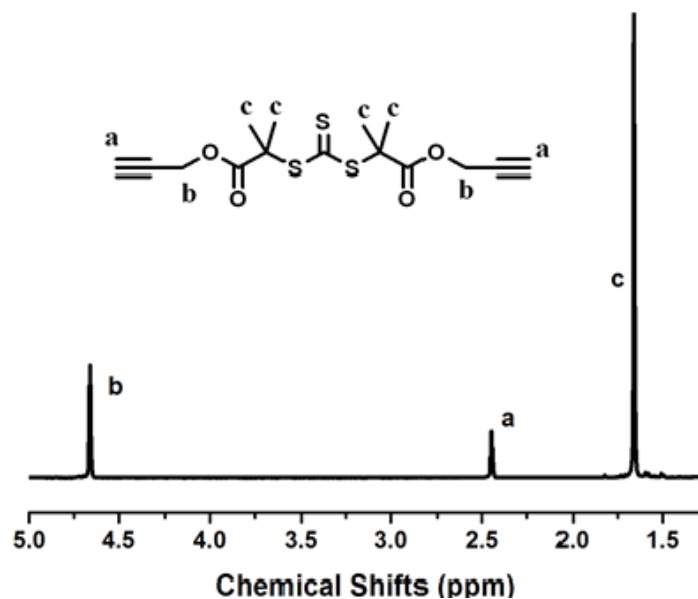

10

Fig. S1  $^1\text{H}$  NMR spectrum of dialkynetrithiocarbonate in  $\text{CDCl}_3$ .

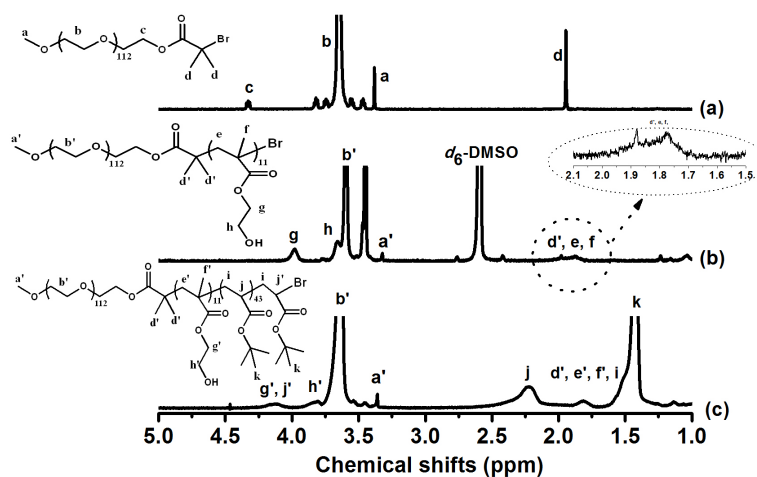

15 Fig. S2  $^1\text{H}$  NMR spectra of (a) PEG-Br in  $\text{CDCl}_3$ , (b) PEG-*b*-PHEMA in  $d_6$ -DMSO and (c) PEG-*b*-PHEMA-*b*-PtBA in  $\text{CDCl}_3$ .

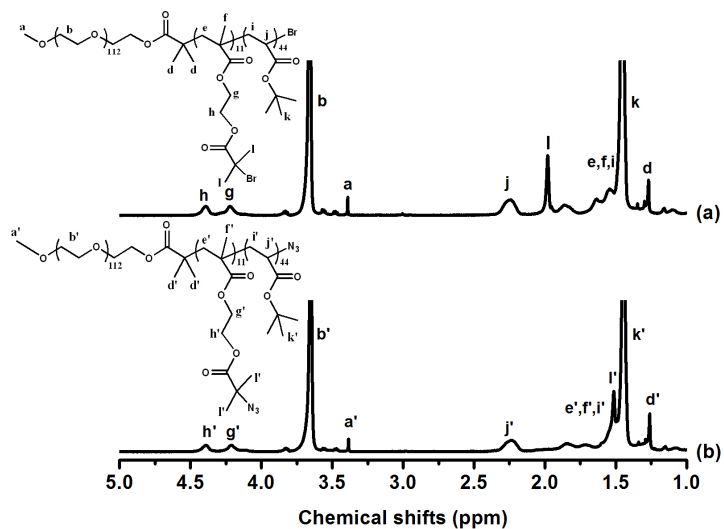

**Fig. S3**  $^1\text{H}$  NMR spectra of (a) PEG-*b*-PBIEM-*b*-PtBA and (b) PEG-*b*-(PBIEM-*g*-N<sub>3</sub>)-*b*-PtBA in CDCl<sub>3</sub>.

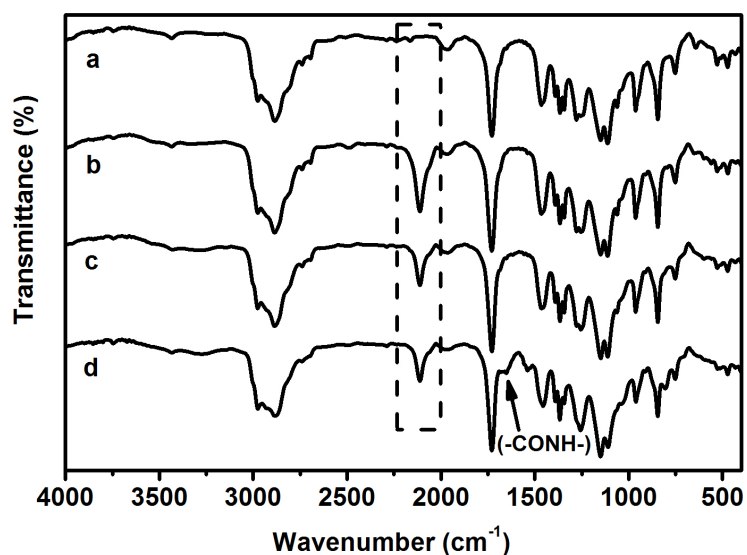

**Fig. S4** FTIR spectra of (a) PEG-*b*-PBIEM-*b*-PtBA, (b) PEG-*b*-(PBIEM-*g*-N<sub>3</sub>)-*b*-PtBA, (c) click reaction induced micelles, and (d) micelles after in situ RAFT polymerization of NIPAM.

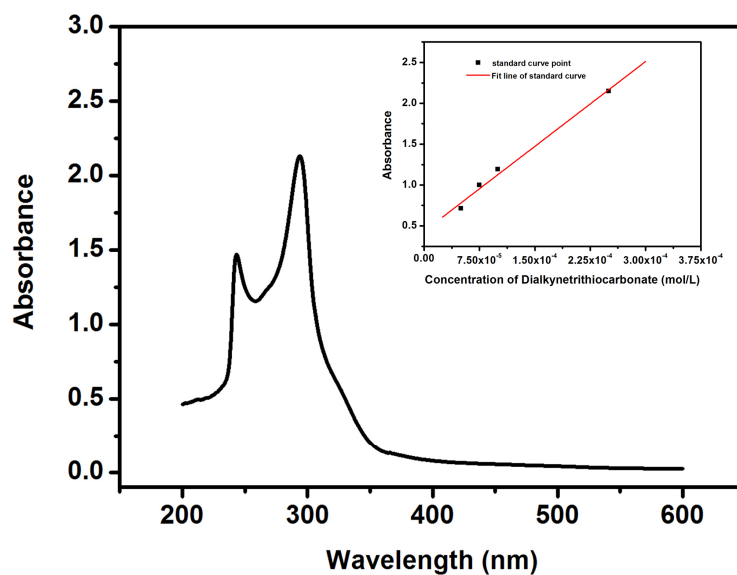

**Fig. S5** UV-vis absorption of click reaction induced micelles with RAFT CTA in the cores. The inset shows a standard absorption curve of RAFT CTA recorded at 300 nm.

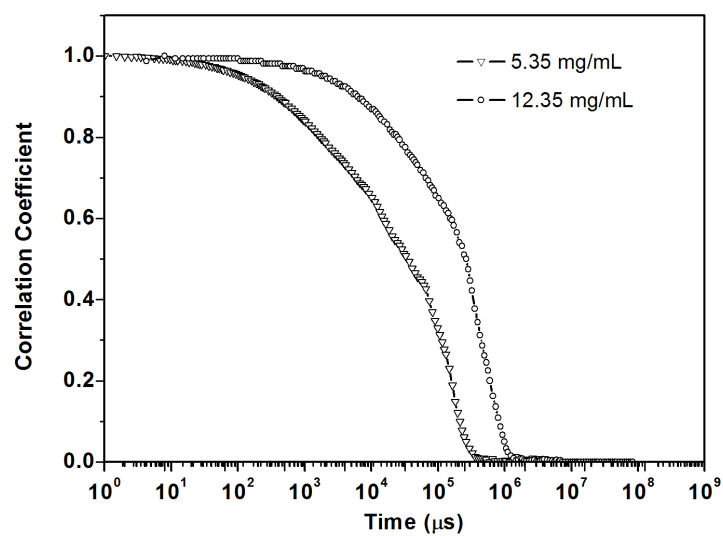

**Fig. S6** Autocorrelation functions of click reaction induced micelles prepared at polymer concentrations of 5.35 mg/mL and 12.35 mg/mL in DMF.
